Development 133, 1856 (2006) doi:10.1242/dev.02390

***belladonna*(*lhx2*) is required for neural patterning and midline axon guidance in the zebrafish forebrain**

**Anandita Seth, James Culverwell, Mitchell Walkowicz, Sabrina Toro, Jens M. Rick, Stephan C. F. Neuhaus, Zoltan M. Varga and Rolf O. Karlstrom** *Development* **133**, 725-735.

An error in this article was not corrected before publication.

The GenBank Accession Number quoted on p. 726 for the *lhx2*-coding region should read DQ146407 (not 725255).

The authors apologise to readers for this mistake.
